# Supplementary material for: Catalytic DNA Polymerization Can Be Expedited by Active Product Release
Source: PubMed Central journal article supplement (PMC9325435; doi:10.1002/anie.202114581), 2022-04-20
Supplement: ANIE-61-0-s001.pdf [file ANIE-61-0-s001.pdf]

**Author Contributions**

P.G.M. and R.S. conceived the experiments. P.G.M. performed the experiments and analysis. M.G. produced and purified the helicase. All authors contributed to writing of the paper.
